# Supplementary material for: Low Expression of GLIS2 Gene Might Associate with Radiosensitivity of Gastric Cancer
Source: J Oncol. 2019 Jun 9;2019:2934925. doi: 10.1155/2019/2934925 (PMC6590498; doi:10.1155/2019/2934925)
Supplement: Supplementary Materials — Table S1: basic patient characteristics. Table S2: associations of clinical indicators and GLIS2 expression level with total survival in all data. Table S3: association analysis between radiotherapy and survival under different expressions of GLIS2 for M0 stage patients. Figure S1: the HR values of radiotherapy along with different cutoffs. We chose different quantiles as cutoff to divide high and low expression group for further survival analysis. [file 2934925.f1.zip]

Archive with 2 entries (2 files):
- 2934925.f1.eps
- 2934925.f2.docx
